# Supplementary material for: Stepwise Development of Hematopoietic Stem Cells from Embryonic Stem Cells
Source: PubMed Central journal article supplement (PMC2653650; doi:10.1371/journal.pone.0004820), 2009-03-16
Supplement: pone.0004820.s001.pdf [file pone.0004820.s001.pdf]

**Table S1 Numbers of EB6 cells sorted for co-culture and of co-cultured cells sorted for transplantation**

| Subpopulations of EB6 cells          | % cells on flow cytometry | No. of sorted cells for co-culture | No. of sorted cells for transplantation |
|--------------------------------------|---------------------------|------------------------------------|-----------------------------------------|
| CD41 <sup>+</sup>                    | 7.2                       | 1.9x10 <sup>6</sup>                | 1.0x10 <sup>7</sup>                     |
| CD41 <sup>-</sup>                    | 92                        | 2.0x10 <sup>7</sup>                | 2.0x10 <sup>6</sup>                     |
| c-Kit <sup>+</sup> CD41 <sup>+</sup> | 5.3                       | 1.4x10 <sup>6</sup>                | 1.5x10 <sup>7</sup>                     |
| c-Kit <sup>-</sup> CD41 <sup>+</sup> | 1.7                       | 5.0x10 <sup>6</sup>                | 6.0x10 <sup>5</sup>                     |
| CD34 <sup>+</sup> CD41 <sup>+</sup>  | 6.5                       | 2.0x10 <sup>6</sup>                | 2.5x10 <sup>6</sup>                     |
| CD34 <sup>-</sup> CD41 <sup>+</sup>  | 0.5                       | 1.1x10 <sup>5</sup>                | 1.2x10 <sup>7</sup>                     |

CD41<sup>+</sup> and CD41<sup>-</sup> cells, c-Kit<sup>+</sup>CD41<sup>+</sup> and c-Kit<sup>-</sup>CD41<sup>+</sup> cells, or CD34<sup>+</sup>CD41<sup>+</sup> and CD34<sup>-</sup>CD41<sup>+</sup> cells were simultaneously sorted by flow cytometry. Sorted cells were co-cultured with OP9 cells for 4 days under the HOXB4-on condition. GFP<sup>+</sup> cells were separated from the co-cultures by flow cytometry. For each group of cell populations, one tenth of the volume of buffer containing GFP<sup>+</sup> cells was transplanted into each of 5-10 lethally irradiated mice.
