# Supplementary material for: Stepwise Development of Hematopoietic Stem Cells from Embryonic Stem Cells
Source: PubMed Central journal article supplement (PMC2653650; doi:10.1371/journal.pone.0004820), 2009-03-16
Supplement: pone.0004820.s002.pdf [file pone.0004820.s002.pdf]

**Supplemental Table S2 Numbers of co-cultured cells for transplantation**

| Subpopulations<br>of co-cultured cells | % cells<br>on flow cytometry | No. of cells sorted<br>for transplantation |
|----------------------------------------|------------------------------|--------------------------------------------|
| CD41 <sup>+</sup>                      | 82                           | 5.5x10 <sup>6</sup>                        |
| CD41 <sup>-</sup>                      | 2                            | 1.1x10 <sup>5</sup>                        |
| c-Kit <sup>+</sup>                     | 60                           | 4.0x10 <sup>6</sup>                        |
| c-Kit <sup>-</sup>                     | 15                           | 1.0x10 <sup>6</sup>                        |
| CD34 <sup>+</sup>                      | 55                           | 4.5x10 <sup>6</sup>                        |
| CD34 <sup>-</sup>                      | 15                           | 1.0x10 <sup>6</sup>                        |
| CD45 <sup>+</sup>                      | 20                           | 1.3x10 <sup>6</sup>                        |
| CD45 <sup>-</sup>                      | 60                           | 4.0x10 <sup>6</sup>                        |

1.5x10<sup>6</sup> CD41<sup>+</sup> EB6 cells were co-cultured with OP9 cells for 4 days. CD41<sup>+</sup> and CD41<sup>-</sup> cells, c-Kit<sup>+</sup> and c-Kit<sup>-</sup> cells, CD34<sup>+</sup> and CD34<sup>-</sup> cells, or CD45<sup>+</sup> and CD45<sup>-</sup> cells were simultaneously sorted from the GFP<sup>+</sup> fraction by flow cytometry. For each group of cell populations, one tenth of the volume of buffer containing GFP<sup>+</sup> cells was transplanted into each of 5-10 lethally irradiated mice.
