# Supplementary material for: Stepwise Development of Hematopoietic Stem Cells from Embryonic Stem Cells
Source: PubMed Central journal article supplement (PMC2653650; doi:10.1371/journal.pone.0004820), 2009-03-16
Supplement: pone.0004820.s003.pdf [file pone.0004820.s003.pdf]

Table S3 Adult HSC-related genes up-regulated by HOXB4

| Gene          | Gene Title                                                                   | Genbank   | Map          | MOE430v2     | EB6     | HOXB4-off | HOXB4-on | Hibernating HSC | Cycling HSCs |
|---------------|------------------------------------------------------------------------------|-----------|--------------|--------------|---------|-----------|----------|-----------------|--------------|
| Samd9l        | sterile alpha motif domain containina 9-like                                 | BB145092  | 6 A1-A2      | 1460603_at   | 7.600   | 0.300     | 347.000  | 632.300         | 516.600      |
| Serpina3g     | serine (or cysteine) peptidase inhibitor, clade A, member 3G                 | BC002065  | 12 E         | 1424923_at   | 12.600  | 2.400     | 2103.400 | 4621.100        | 4724.700     |
| Arhgap15      | Rho GTPase activating protein 15                                             | BM246535  | 2 B          | 1435959_at   | 4.700   | 0.900     | 330.500  | 551.000         | 184.100      |
| Prg1          | proteoglycan 1, secretory granule                                            | NM_011157 | 10 B4        | 1417426_at   | 27.300  | 13.200    | 3970.301 | 4937.600        | 2930.400     |
| Cd69          | CD69 antigen                                                                 | AK017979  | 6 F3         | 1428735_at   | 4.100   | 1.300     | 347.500  | 210.100         | 82.000       |
| Ptpcr         | protein tyrosine phosphatase, receptor type C                                | NM_011210 | 1 E4         | 1422124_a_at | 1.500   | 3.900     | 982.700  | 2751.100        | 1439.200     |
| Rgs18         | regulator of G-protein signaling 18                                          | BB139986  | 1 F          | 1420398_at   | 14.200  | 4.000     | 927.300  | 849.500         | 977.200      |
|               |                                                                              |           | 1 F          | 1449856_at   | 8.100   | 5.400     | 508.400  | 931.300         | 1014.800     |
| Arhgap30      | Rho GTPase activating protein 30                                             | BM244999  | 1 H3         | 1436171_at   | 17.900  | 2.200     | 490.700  | 202.300         | 146.500      |
| Slco4a1       | solute carrier organic anion transporter family, member 4A                   | AV348121  | 2 H4         | 1438160_x_at | 14.600  | 1.300     | 286.100  | 507.500         | 2869.100     |
| Gp49a         | glycoprotein 49 A                                                            | U05264    | 10 B3 ; 10 B | 1420394_s_at | 37.300  | 11.200    | 2348.600 | 22.700          | 222.900      |
| Pscdbp        | pleckstrin homology, Sec7 and coiled-coil domains, binding                   | BC007144  | 2 C1.1       | 1451206_s_at | 0.900   | 1.600     | 325.600  | 1039.000        | 520.500      |
|               |                                                                              | BB503614  | 2 C1.1       | 1435697_a_at | 4.400   | 15.900    | 479.500  | 2457.500        | 1222.200     |
| Coro1a        | coronin, actin binding protein 1A                                            | BB740218  | 7 F3         | 1455269_a_at | 20.400  | 7.400     | 1190.600 | 1695.400        | 2022.200     |
| Arhgef6       | Rac/Cdc42 guanine nucleotide exchange factor (GEF) 6                         | BM246754  | X A5         | 1429012_at   | 7.600   | 2.300     | 365.500  | 965.700         | 745.600      |
| Ifi203        | interferon activated gene 203                                                | M74124    | 1 H3         | 1426906_at   | 1.300   | 2.200     | 345.200  | 1827.200        | 1088.400     |
|               |                                                                              |           | 1 H3         | 1452231_x_at | 3.200   | 6.700     | 387.000  | 1881.800        | 919.100      |
| Cd53          | CD53 antigen                                                                 | NM_007651 | 3 F2.3       | 1448617_at   | 18.100  | 5.900     | 878.200  | 103.900         | 581.800      |
| Psm8          | proteasome (prosome, macropain) subunit, beta type                           | NM_010724 | 17 B1        | 1422962_a_at | 7.500   | 2.600     | 354.500  | 760.600         | 1180.300     |
| Coro1a        | coronin, actin binding protein 1A                                            | BC002136  | 7 F3         | 1416246_a_at | 30.300  | 15.600    | 2085.800 | 1620.800        | 2927.100     |
| Gli3r1        | GLI pathogenesis-related 1 (glioma)                                          | BC025083  | 10 D1        | 1424927_at   | 20.300  | 8.500     | 968.400  | 996.500         | 2757.400     |
| Evi2b         | ecotropic viral integration site 2b                                          | AI122415  | 11 B5        | 1426505_at   | 15.500  | 2.600     | 295.800  | 540.900         | 296.000      |
| Anxa1         | annexin A1                                                                   | NM_010730 | 19 B         | 1448213_at   | 60.800  | 2.500     | 273.600  | 2153.600        | 1017.800     |
| D12Erd647e    | DNA segment, Chr 12, ERATO Doi 647, expressed                                | AW554405  | 12 E         | 1454757_s_at | 3.100   | 3.500     | 362.000  | 636.000         | 582.900      |
|               |                                                                              | BI655075  | 12 E         | 1452956_a_at | 24.300  | 26.200    | 493.700  | 373.600         | 511.800      |
| Rtp4          | receptor transporter protein 4                                               | BC024872  | 16 B1        | 1418580_at   | 7.000   | 5.600     | 481.900  | 351.400         | 1462.600     |
| Bcl11a        | B-cell CLL                                                                   | BB424718  | 11 A3.2      | 1456632_at   | 10.100  | 2.800     | 203.700  | 293.400         | 199.900      |
| 2410127E16Rik | RIKEN cDNA 2410127E16 gene                                                   | BF731393  | 11 A3.2      | 1457072_at   | 9.200   | 5.600     | 246.200  | 213.700         | 140.200      |
| Plac8         | placenta-specific 8                                                          | AF263458  | 5 E3         | 1451335_at   | 65.500  | 24.900    | 1781.100 | 388.700         | 255.700      |
| Ltb           | lymphotoxin B                                                                | NM_008518 | 17 B1        | 1419135_at   | 13.100  | 4.100     | 273.900  | 1064.000        | 382.800      |
| Cxcl4         | chemokine (C-X-C motif) ligand 4                                             | NM_019932 | 5 E1         | 1448995_at   | 43.000  | 54.400    | 3525.502 | 655.900         | 449.700      |
| Prtn3         | proteinase 3                                                                 | U97073    | 10 C1        | 1419669_at   | 13.100  | 9.700     | 612.600  | 1781.900        | 275.000      |
| Gpr171        | G protein-coupled receptor 171                                               | BB229616  | 3 D          | 1438439_at   | 0.700   | 4.200     | 255.000  | 539.800         | 337.900      |
| Phb           | prohibitin                                                                   | BM243379  |              | 1435144_at   | 9.900   | 7.300     | 436.300  | 201.400         | 316.000      |
| Rac2          | RAS-related C3 botulinum substrate 2                                         | NM_009008 | 15 E1        | 1417620_at   | 36.400  | 18.100    | 1071.200 | 826.000         | 851.600      |
| Angpt1        | angiopoietin 1                                                               | BB453314  | 15 B3.1      | 1439066_at   | 35.000  | 13.500    | 706.700  | 2552.500        | 1058.200     |
| Lzp-s         | P lysozyme structural                                                        | AV066625  | 10 D2        | 1436996_x_at | 19.300  | 16.700    | 829.700  | 3204.800        | 976.100      |
|               |                                                                              | AV058500  | 10 D2        | 1439426_x_at | 11.200  | 17.300    | 429.600  | 2728.200        | 218.400      |
| Arhgap9       | Rho GTPase activating protein 9                                              | BB327418  | 10 D3        | 1436097_x_at | 13.300  | 4.200     | 205.700  | 210.500         | 216.200      |
| Usp18         | ubiquitin specific peptidase 18                                              | NM_011909 | 6 F          | 1418191_at   | 7.400   | 7.100     | 335.800  | 21.800          | 289.300      |
| St8sia4       | ST8 alpha-N-acetylneuraminide alpha-2,8-lectin, galactose binding, soluble 9 | NM_009183 | 1 D          | 1419186_a_at | 30.200  | 14.300    | 612.300  | 907.200         | 1413.400     |
| Lgals9        | lectin, galactose binding, soluble 9                                         | NM_010708 | 11 B5        | 1421217_a_at | 69.300  | 61.200    | 2617.300 | 426.900         | 484.700      |
| Mpo           | myeloperoxidase                                                              | NM_010824 | 11 C         | 1415960_at   | 154.800 | 114.400   | 4844.898 | 624.900         | 16.300       |
| Trim30        | tripartite motif protein 30                                                  | BM240719  | 7 E3         | 1417961_a_at | 18.800  | 5.400     | 228.300  | 766.800         | 924.200      |
|               |                                                                              | AF220015  | 7 E3         | 1451860_a_at | 27.900  | 17.800    | 294.800  | 188.000         | 373.600      |
| Adcy7         | adenylate cyclase 7                                                          | BB746807  |              | 1456307_s_at | 32.700  | 33.000    | 1293.800 | 1817.500        | 1072.300     |
|               |                                                                              | NM_007406 | 8 C3         | 1450065_at   | 16.900  | 10.700    | 417.700  | 261.000         | 217.500      |
| Ifih1         | interferon induced with helicase C domain 1                                  | AY075132  | 2 C3         | 1426276_at   | 2.600   | 10.400    | 397.600  | 765.200         | 999.200      |

|               |                                                               |           |           |              |         |        |          |          |          |
|---------------|---------------------------------------------------------------|-----------|-----------|--------------|---------|--------|----------|----------|----------|
| Ptgs1         | prostaglandin-endoperoxide<br>synthase 1                      | BB520073  | 2 B       | 1423414_at   | 20.400  | 5.900  | 224.700  | 256.300  | 326.600  |
|               |                                                               | AA833146  | 2 B       | 1436448_a_at | 13.000  | 14.300 | 206.900  | 351.300  | 365.500  |
| Ifi47         | interferon gamma inducible<br>protein 47                      | NM_008330 | 11 B1.2   | 1417292_at   | 11.700  | 5.600  | 207.300  | 833.200  | 2423.100 |
| Slamf1        | signaling lymphocytic<br>activation molecule family           | BB132695  | 1 H3      | 1425570_at   | 10.200  | 14.300 | 522.700  | 223.200  | 143.400  |
| Pla2g4a       | phospholipase A2, group IVA<br>(cytosolic, calcium-dependent) | NM_008869 | 1 G1      | 1448558_a_at | 47.200  | 22.800 | 784.300  | 470.100  | 1298.600 |
| Gvin1         | GTPase, very large interferon<br>inducible 1                  | BM243571  | 7 E3      | 1429184_at   | 12.500  | 19.200 | 660.000  | 2112.800 | 2077.300 |
| Btk           | Bruton agammaglobulinemia<br>tyrosine kinase                  | NM_013482 | X E3      | 1422755_at   | 1.200   | 15.000 | 513.200  | 222.500  | 350.900  |
| Dock2         | dedicator of cyto-kinesis 2                                   | NM_033374 | 11 A5     | 1422808_s_at | 12.400  | 10.300 | 331.700  | 1408.500 | 819.000  |
| Ugt1a2        | UDP glucuronosyltransferase<br>1 family, polypeptide A2       | D87867    | 1 D ; 1 D | 1426260_a_at | 15.600  | 12.100 | 387.800  | 250.500  | 248.300  |
| Lst1          | leukocyte specific transcript 1                               | U72644    | 17 B1     | 1425548_a_at | 9.000   | 18.100 | 578.800  | 998.700  | 534.700  |
| Gbp6          | guanylate binding protein 6                                   | BM241271  | 3 H1      | 1434380_at   | 33.500  | 17.900 | 565.500  | 918.900  | 932.600  |
| Dock10        | dedicator of cytokinesis 10                                   | BF715043  | 1 C5      | 1435343_at   | 9.400   | 9.000  | 278.000  | 521.400  | 427.900  |
| 6330500D04Rik | RIKEN cDNA 6330500D04<br>gene                                 | BM242294  | 13 A3.2   | 1460555_at   | 11.500  | 9.600  | 280.600  | 980.700  | 470.700  |
| Coro2a        | coronin, actin binding protein<br>2A                          | AI316747  | 4 B1      | 1452367_at   | 12.900  | 7.400  | 213.900  | 220.900  | 232.000  |
| Ankrd44       | ankyrin repeat domain 44                                      | AV256780  | 1 C1.2    | 1434856_at   | 23.500  | 9.000  | 246.000  | 208.700  | 185.100  |
| AI586015      | expressed sequence AI586015                                   | NM_019992 | 5 E1      | 1421098_at   | 6.200   | 8.600  | 228.200  | 183.600  | 219.400  |
| Parp9         | poly (ADP-ribose) polymerase<br>family, member 9              | NM_030253 | 16 B3     | 1416897_at   | 20.500  | 10.800 | 272.200  | 441.900  | 832.800  |
| Rgs2          | regulator of G-protein<br>signaling 2                         | AF215668  | 1 F       | 1419247_at   | 27.500  | 22.600 | 568.800  | 2383.900 | 23.500   |
|               |                                                               |           | 1 F       | 1419248_at   | 51.900  | 45.300 | 875.500  | 2819.800 | 105.300  |
| Bcl11a        | regulator of G-protein<br>signaling 2<br>B-cell CLL           | BB034265  | 1 F       | 1447830_s_at | 24.100  | 16.200 | 286.300  | 1291.800 | 53.700   |
|               |                                                               | NM_016707 | 11 A3.2   | 1419406_a_at | 14.500  | 17.100 | 428.000  | 1133.900 | 555.600  |
| H2-D1         | histocompatibility 2, D region<br>locus 1                     | L36068    | 17 B1     | 1451784_x_at | 69.800  | 28.100 | 702.300  | 4307.000 | 3522.000 |
| Centb1        | centaurin, beta 1                                             | BB115902  | 11 B3     | 1434873_a_at | 30.700  | 30.500 | 731.400  | 1667.000 | 691.600  |
|               |                                                               | BB757196  | 11 B3     | 1437117_at   | 34.300  | 30.700 | 321.800  | 497.800  | 382.600  |
| Lcp1          | lymphocyte cytosolic protein 1                                | NM_008879 | 14 D3     | 1448160_at   | 57.900  | 37.300 | 869.700  | 276.500  | 717.600  |
|               |                                                               |           | 14 D3     | 1415983_at   | 68.400  | 65.100 | 1272.000 | 2087.100 | 2622.100 |
| Lyzs          | lysozyme                                                      | AW208566  | 10 D2     | 1423547_at   | 27.100  | 18.600 | 419.700  | 942.200  | 233.700  |
| Ly6e          | lymphocyte antigen 6 complex,<br>locus E                      | BM245572  | 15 D3     | 1453304_s_at | 98.000  | 63.600 | 1408.400 | 2529.600 | 3664.900 |
| Cdk6          | cyclin-dependent kinase 6                                     | BM238926  | 5 A2-A3   | 1455287_at   | 76.200  | 56.700 | 1227.900 | 703.700  | 919.900  |
|               |                                                               |           | 5 A2-A3   | 1435338_at   | 72.800  | 49.400 | 1046.300 | 639.300  | 767.600  |
| H2-L          | histocompatibility 2, D region                                | M69068    | 17 B1     | 1451931_x_at | 56.500  | 26.900 | 564.600  | 4539.600 | 3575.800 |
| H2-D1         | histocompatibility 2, D region<br>locus 1                     | M86502    | 17 B1     | 1425545_x_at | 91.800  | 34.700 | 724.800  | 4509.600 | 3430.900 |
| Gimap6        | GTPase, IMAP family member<br>6                               | BB667753  | 6 B2.3    | 1427891_at   | 29.400  | 14.400 | 292.300  | 747.700  | 416.900  |
| Ncf2          | neutrophil cytosolic factor 2                                 | NM_010877 | 1 G3      | 1448561_at   | 19.900  | 16.800 | 337.400  | 617.600  | 242.000  |
| Clu           | clusterin                                                     | AV152288  | 14 D1     | 1437689_x_at | 141.200 | 57.800 | 1116.400 | 466.200  | 375.600  |
|               |                                                               | BB433678  | 14 D1     | 1454849_x_at | 145.700 | 90.000 | 1191.500 | 508.000  | 437.000  |
|               |                                                               | AV075715  | 14 D1     | 1437458_x_at | 110.000 | 79.500 | 974.100  | 496.200  | 433.000  |
| Lrmp          | lymphoid-restricted membrane<br>protein                       | NM_008511 | 6 G3      | 1448409_at   | 22.600  | 15.900 | 296.100  | 300.700  | 200.200  |
| Il2rg         | interleukin 2 receptor, gamma<br>chain                        | L20048    | X C3      | 1416295_a_at | 61.400  | 52.300 | 972.000  | 1599.100 | 2037.000 |
|               |                                                               |           | X C3      | 1416296_at   | 48.500  | 39.000 | 643.400  | 796.500  | 1577.300 |
| Mbnl3         | muscleblind-like 3 (Drosophila)                               | AV306759  | X A4      | 1434678_at   | 31.600  | 12.200 | 226.500  | 527.300  | 939.800  |
| EG622147      | predicted gene, EG622147                                      | BB794742  |           | 1455892_x_at | 11.800  | 16.900 | 302.800  | 526.200  | 1227.400 |
| Cd1d1         | CD1d1 antigen                                                 | NM_007639 | 3 F1      | 1449130_at   | 23.700  | 13.000 | 229.900  | 652.700  | 132.800  |
| Cmtm7         | CKLF-like MARVEL<br>transmembrane domain                      | NM_133978 | 9 F3      | 1460253_at   | 80.400  | 80.800 | 1394.700 | 613.000  | 619.300  |
| Myo1g         | myosin IG                                                     | BB235320  |           | 1427892_at   | 15.600  | 14.700 | 250.200  | 364.500  | 359.800  |
| Cugbp2        | CUG triplet repeat, RNA<br>binding protein 2                  | BB644164  | 2 A2-A3   | 1423895_a_at | 38.700  | 25.400 | 415.700  | 1889.800 | 1553.400 |
|               |                                                               |           | 2 A2-A3   | 1451154_a_at | 103.300 | 71.900 | 1046.000 | 1183.900 | 924.200  |
|               |                                                               | BB667096  | 2 A2-A3   | 1450069_a_at | 81.900  | 44.000 | 562.300  | 615.800  | 560.300  |
| Akr1c12       | aldo-keto reductase family 1,<br>member C12                   | AF177041  | 13 A1     | 1450455_s_at | 23.500  | 21.600 | 350.300  | 316.700  | 973.300  |
| Akr1c13       | aldo-keto reductase family 1,<br>member C13                   | NM_013778 | 13 A1     | 1418672_at   | 28.200  | 14.300 | 228.400  | 557.500  | 1277.700 |

|               |                                                                              |           |              |              |          |         |          |          |          |
|---------------|------------------------------------------------------------------------------|-----------|--------------|--------------|----------|---------|----------|----------|----------|
| Fxyd5         | FXYP domain-containing ion transport regulator 5                             | NM_008761 | 7 A3         | 1418296_at   | 24.400   | 27.000  | 416.400  | 2158.300 | 1669.100 |
| Spn           | sialoporphin                                                                 | BB160586  | 7 F3-F4      | 1439034_at   | 9.700    | 14.200  | 216.900  | 1568.200 | 1243.900 |
| Rab38         | Rab38, member of RAS oncoene familv                                          | NM_028238 | 7 D3         | 1417700_at   | 88.700   | 69.800  | 1057.400 | 1549.000 | 1688.300 |
|               |                                                                              | AV364767  | 7 D3         | 1439628_x_at | 71.500   | 72.400  | 899.500  | 2652.400 | 2559.400 |
| Emilin2       | elastin microfibril interfacer 2                                             | BB811788  | 17 E1.3      | 1435264_at   | 54.500   | 54.700  | 826.700  | 36.500   | 307.800  |
| Mpl           | myeloproliferative leukemia virus oncoene regulator of G-protein signaling 1 | NM_010823 | 4 D          | 1421461_at   | 31.700   | 23.800  | 357.300  | 1965.300 | 883.600  |
| Rgs1          | regulator of G-protein signaling 1                                           | NM_015811 | 1 F          | 1417601_at   | 16.000   | 17.600  | 246.200  | 2592.200 | 147.500  |
| Pycard        | PYP and CARD domain containina                                               | BG084230  | 7 F4         | 1417346_at   | 62.700   | 44.000  | 609.500  | 256.900  | 932.100  |
| ---           | ---                                                                          | AW556821  | X A3.3       | 1419033_at   | 82.600   | 57.100  | 776.700  | 1744.300 | 1538.800 |
| Lrrc33        | leucine rich repeat containing 33                                            | BC027411  | 16 B2        | 1451174_at   | 63.100   | 58.600  | 794.000  | 471.700  | 996.400  |
| D11Erd759e    | DNA segment, Chr 11, ERATO Doi 759. expressed                                | AW556558  | 11 E2        | 1455500_at   | 47.000   | 47.800  | 641.600  | 701.300  | 1209.300 |
| 1200013B08Rik | RIKEN cDNA 1200013B08 gene                                                   | AK004734  | X A4         | 1427007_at   | 43.200   | 43.000  | 544.300  | 955.700  | 621.700  |
| Plek          | pleckstrin                                                                   | AF181829  | 11 A2        | 1448748_at   | 184.800  | 119.500 | 1505.400 | 609.000  | 168.600  |
| Dtx3l         | deltex 3-like (Drosophila)                                                   | AV327407  | 16 B3        | 1435208_at   | 33.100   | 22.900  | 282.300  | 444.200  | 513.600  |
| Ptger3        | prostaglandin E receptor 3 (subtype EP3)                                     | NM_011196 | 3 H4         | 1450344_a_at | 35.900   | 29.400  | 354.600  | 571.600  | 666.400  |
| Klk8          | kallikrein related-peptidase 8                                               | NM_008940 | 7 B3         | 1419722_at   | 33.100   | 24.500  | 292.900  | 322.300  | 86.300   |
| Nckap1l       | NCK associated protein 1 like                                                | BM238906  | 15 F3        | 1428786_at   | 12.000   | 22.700  | 268.500  | 753.300  | 512.900  |
| Fos           | FBJ osteosarcoma oncogene                                                    | AV026617  | 12 D2        | 1423100_at   | 341.400  | 130.300 | 1480.500 | 6066.600 | 14.100   |
| AW491445      | expressed sequence AW491445                                                  | AV300228  | 19 A         | 1426883_at   | 25.800   | 19.100  | 215.200  | 625.300  | 389.300  |
| Casp8         | caspase 8                                                                    | BC006737  | 1 B          | 1424552_at   | 61.000   | 40.900  | 455.900  | 450.400  | 827.700  |
| Pik3cg        | phosphoinositide-3-kinase, catalytic, gamma polypeptide                      | BB205102  | 12 B         | 1422707_at   | 17.100   | 25.800  | 278.400  | 234.000  | 350.500  |
| Ifitm1        | interferon induced transmembrane protein 1                                   | BC027285  | 7 F5         | 1424254_at   | 308.100  | 235.700 | 2539.301 | 5467.600 | 4116.800 |
| Vamp5         | vesicle-associated membrane protein 5                                        | AK009266  | 6 C1         | 1430522_a_at | 22.900   | 23.200  | 249.900  | 653.700  | 1413.300 |
| Stat1         | signal transducer and activator of transcription 1                           | AW214029  | 1 C1.1       | 1450033_a_at | 51.500   | 27.800  | 294.000  | 242.300  | 747.100  |
|               |                                                                              |           | 1 C1.1       | 1450034_at   | 53.800   | 39.100  | 389.700  | 440.600  | 900.200  |
| Samsn1        | SAM domain, SH3 domain and nuclear localization signals. 1                   | NM_023380 | 16 C3.1      | 1421457_a_at | 112.100  | 82.800  | 860.100  | 373.500  | 478.400  |
| Mylk          | myosin, light polypeptide kinase                                             | BF451748  | 16 B3        | 1425506_at   | 41.500   | 24.500  | 242.900  | 398.700  | 243.200  |
| Irgm          | immunity-related GTPase familv. M                                            | NM_008326 | 11 B1.2      | 1418825_at   | 22.800   | 28.500  | 282.400  | 241.400  | 606.900  |
| Birc3         | baculoviral IAP repeat-containing 3                                          | NM_007464 | 9 A2         | 1421392_a_at | 64.300   | 29.200  | 287.600  | 864.000  | 189.800  |
| Nr4a1         | nuclear receptor subfamily 4, group A, member 1                              | NM_010444 | 15 F         | 1416505_at   | 84.100   | 65.300  | 632.300  | 5624.100 | 35.600   |
| Csf2rb2       | colony stimulating factor 2 receptor, beta 2, low-affinitv                   | NM_007781 | 15 E1        | 1449360_at   | 70.300   | 74.900  | 713.000  | 110.900  | 375.400  |
| Lgals1        | lectin, galactose binding, soluble 1                                         | NM_008495 | 15 E         | 1419573_a_at | 873.400  | 425.800 | 4024.000 | 203.800  | 471.500  |
|               |                                                                              | AI642438  | 15 E         | 1455439_a_at | 1521.600 | 731.400 | 6338.198 | 414.100  | 806.800  |
| Cyfp2         | cytoplasmic FMR1 interacting protein 2                                       | AK005148  |              | 1428347_at   | 27.700   | 23.700  | 219.900  | 648.300  | 299.000  |
| Icam1         | intercellular adhesion molecule                                              | BC008626  | 9 A3         | 1424067_at   | 56.400   | 25.200  | 231.400  | 1474.400 | 163.800  |
| AY078069      | cDNA sequence AY078069                                                       | AW495632  | 7 A3         | 1436074_at   | 29.300   | 23.700  | 214.500  | 1186.200 | 138.000  |
| Foxp1         | forkhead box P1                                                              | BM220880  | 6 E1         | 1435222_at   | 67.200   | 52.300  | 472.400  | 689.300  | 185.800  |
|               |                                                                              | BG962849  | 6 E1         | 1421140_a_at | 48.600   | 36.600  | 251.400  | 347.400  | 85.700   |
| Elf1          | E74-like factor 1                                                            | NM_007920 | 14 D3        | 1417540_at   | 98.200   | 78.900  | 698.300  | 616.800  | 321.300  |
| Lapm5         | lysosomal-associated protein transmembrane 5                                 | BB218107  | 4 D2.3       | 1436905_x_at | 238.800  | 190.700 | 1666.900 | 4201.000 | 2986.000 |
|               |                                                                              | U29539    | 4 D2.3       | 1426025_s_at | 70.100   | 91.300  | 564.600  | 1488.700 | 567.800  |
| Chst11        | carbohydrate sulfotransferase 11                                             | AK003880  | 10 C1        | 1428902_at   | 36.500   | 46.200  | 403.100  | 314.800  | 71.200   |
| Rbp1          | retinol binding protein 1, cellular                                          | NM_011254 | 9 E3.3       | 1448754_at   | 66.900   | 30.300  | 250.700  | 542.200  | 171.200  |
| Csf2rb1       | colony stimulating factor 2 receptor, beta 1, low-affinitv                   | BB769628  |              | 1455660_at   | 355.600  | 285.000 | 2343.300 | 86.000   | 492.900  |
| Muc13         | mucin 13, epithelial transmembrane                                           | NM_010739 | 16 B3        | 1419387_s_at | 86.400   | 57.000  | 464.400  | 1068.800 | 1759.000 |
| Ptpn18        | protein tyrosine phosphatase, non-receptor type 18                           | NM_011206 | 1 B          | 1419125_at   | 92.600   | 71.400  | 580.400  | 849.700  | 495.300  |
| Nfkbia        | nuclear factor of kappa light chain gene enhancer in B-cells                 | BB096843  | 12 C1-C3     | 1438157_s_at | 508.000  | 203.400 | 1623.800 | 5997.100 | 1381.200 |
|               |                                                                              | NM_010907 | 12 C1-C3     | 1448306_at   | 188.900  | 85.200  | 451.200  | 2915.800 | 245.400  |
| 4632417K18Rik | RIKEN cDNA 4632417K18 gene                                                   | NM_026640 | 19 B         | 1422628_at   | 110.600  | 101.100 | 801.700  | 208.400  | 1302.000 |
| Nfkbiz        | nuclear factor of kappa light polypeptide gene enhancer in                   | AB026551  | 16 C1.2-C1.3 | 1417483_at   | 98.900   | 43.700  | 343.500  | 3405.100 | 114.300  |

|               |                                                                |           |              |              |          |         |          |          |          |
|---------------|----------------------------------------------------------------|-----------|--------------|--------------|----------|---------|----------|----------|----------|
| Sec11c        | SEC11 homolog C (S. cerevisiae)                                | AK007641  | 18 E1        | 1460698_a_at | 100.500  | 111.200 | 820.500  | 658.200  | 755.500  |
| D330050I23Rik | RIKEN cDNA D330050I23 gene                                     | BE303700  | 15 D1        | 1434301_at   | 34.100   | 34.600  | 255.200  | 70.800   | 241.300  |
| LOC677168     | hypothetical protein LOC677168                                 | AK019325  | 17 B3        | 1431591_s_at | 32.400   | 27.700  | 202.700  | 78.200   | 265.000  |
| Plscr1        | phospholipid scramblase 1                                      | BF319989  | 9 E3.3 ; 1 C | 1429527_a_at | 111.800  | 78.400  | 571.200  | 249.300  | 868.000  |
| Tapbp         | TAP binding protein                                            | AF043943  | 17 B1        | 1421812_at   | 91.600   | 79.700  | 579.600  | 1393.700 | 2514.700 |
| Emb           | embigin                                                        | BG064842  | 13 D2.3      | 1415857_at   | 662.400  | 309.500 | 2231.600 | 312.700  | 550.300  |
|               |                                                                | BG064842  | 13 D2.3      | 1415856_at   | 265.400  | 146.600 | 800.400  | 379.400  | 562.000  |
| Plscr1        | phospholipid scramblase 1                                      | BF319989  | 9 E3.3       | 1453181_x_at | 119.800  | 105.900 | 762.400  | 357.700  | 1462.800 |
| Lgals3bp      | lectin, galactoside-binding, soluble, 3 binding protein        | NM_011150 | 11 E         | 1448380_at   | 51.700   | 57.600  | 408.000  | 658.300  | 1253.500 |
| Arhgdib       | Rho, GDP dissociation inhibitor (GDI) beta                     | AK002516  | 6 G1         | 1426454_at   | 535.300  | 432.700 | 3019.300 | 1714.300 | 1217.000 |
| Socs3         | suppressor of cytokine signaling 3                             | BB241535  | 11 E2        | 1455899_x_at | 56.800   | 35.400  | 244.300  | 1882.600 | 66.900   |
| Nfkbia        | nuclear factor of kappa light chain gene enhancer in B-cells   | AI462015  |              | 1449731_s_at | 141.100  | 72.000  | 495.200  | 2576.300 | 431.700  |
| Stard10       | START domain containing 10                                     | NM_019990 | 7 E1         | 1448956_at   | 56.900   | 55.400  | 380.300  | 540.700  | 714.000  |
| Ripk3         | receptor-interacting serine-threonine kinase 3                 | NM_019955 | 14 C1        | 1448449_at   | 25.400   | 29.800  | 201.200  | 673.500  | 1065.300 |
| Tspo          | translocator protein                                           | AV101079  | 15 E2        | 1438948_x_at | 73.000   | 51.100  | 339.300  | 599.800  | 866.600  |
| H2-T23        | histocompatibility 2, T region locus 23                        | NM_010398 | 17 B1        | 1449556_at   | 33.600   | 46.000  | 295.200  | 3047.500 | 2498.300 |
| Mgst1         | microsomal glutathione S-transferase 1                         | BI150149  | 6 G1         | 1415897_a_at | 109.600  | 77.400  | 495.600  | 349.200  | 92.100   |
| Brd4          | bromodomain containing 4                                       | BC008532  | 8 B3.3       | 1424921_at   | 43.100   | 44.100  | 280.600  | 126.300  | 873.000  |
| Tspo          | translocator protein                                           | BC002055  | 15 E2        | 1416695_at   | 109.600  | 84.000  | 531.500  | 340.100  | 977.600  |
| Basp1         | brain abundant, membrane attached signal protein 1             | AK011545  | 15 B1        | 1428572_at   | 309.800  | 111.700 | 704.600  | 777.600  | 1645.400 |
| Cd34          | CD34 antigen                                                   | NM_133654 | 1 H6         | 1416072_at   | 216.100  | 146.800 | 925.100  | 529.200  | 678.000  |
| 3110001A13Rik | RIKEN cDNA 3110001A13 gene                                     | BC021353  | 2 A1         | 1416892_s_at | 226.700  | 123.700 | 776.000  | 5144.000 | 2071.300 |
|               |                                                                |           | 2 A1         | 1416893_at   | 112.500  | 67.500  | 354.500  | 532.600  | 54.100   |
| Ifi35         | interferon-induced protein 35                                  | AW986054  | 11 D         | 1459151_x_at | 46.800   | 35.100  | 217.200  | 252.400  | 711.300  |
|               |                                                                |           | 11 D         | 1445897_s_at | 197.300  | 170.400 | 933.300  | 1316.200 | 2230.900 |
| Itga6         | integrin alpha 6                                               | BM935811  | 2 C2         | 1422444_at   | 89.400   | 51.200  | 316.200  | 241.600  | 219.200  |
| Isgf3g        | interferon dependent positive actin transcription factor 3     | NM_008394 | 14 C2        | 1421322_a_at | 50.300   | 40.100  | 244.100  | 192.400  | 237.600  |
| Man2a2        | mannosidase 2, alpha 2                                         | BB794673  | 7 D2         | 1435203_at   | 66.900   | 61.000  | 371.100  | 933.500  | 770.900  |
| Nt5c          | 5',3'-nucleotidase, cytosolic                                  | NM_015807 | 11 E         | 1417252_at   | 103.600  | 62.600  | 371.700  | 177.600  | 548.800  |
| Myd88         | myeloid differentiation primary response gene 88               | BC005591  | 9 F3         | 1419272_at   | 43.800   | 42.700  | 253.100  | 153.400  | 367.800  |
| Elmo1         | engulfment and cell motility 1, ced-12 homolog (C. elegans)    | BC024727  | 13 A3.1      | 1424523_at   | 40.900   | 41.500  | 245.900  | 295.200  | 367.900  |
| Tgfb2         | transforming growth factor, beta receptor II                   | BG793483  | 9 F3         | 1426397_at   | 177.100  | 114.300 | 675.600  | 647.500  | 466.900  |
| Igtp          | interferon gamma induced GTPase                                | NM_018738 | 11 B1.3      | 1417141_at   | 23.100   | 42.100  | 248.300  | 688.600  | 3013.700 |
| Rcsd1         | RCSD domain containing 1                                       | BC025872  | 1 H2.3       | 1424194_at   | 39.800   | 35.100  | 205.600  | 618.700  | 339.100  |
| Cyba          | cytochrome b-245, alpha polypeptide                            | AK018713  |              | 1454268_a_at | 183.100  | 129.300 | 755.100  | 706.500  | 895.000  |
| Nr3c1         | nuclear receptor subfamily 3, group C, member 1                | NM_008173 | 18 B3        | 1460303_at   | 37.600   | 35.800  | 206.700  | 369.800  | 232.700  |
| 5033414D02Rik | RIKEN cDNA 5033414D02 gene                                     | BC024953  | 19 C1        | 1460361_at   | 169.500  | 139.600 | 783.500  | 532.500  | 353.500  |
| Acsl5         | acyl-CoA synthetase long-chain family member 5                 | AK006541  | 19 D2        | 1428082_at   | 166.100  | 194.200 | 1088.200 | 1296.600 | 1556.600 |
| Tspo          | translocator protein                                           | BB132602  | 15 E2        | 1456251_x_at | 44.400   | 49.400  | 275.200  | 319.300  | 623.100  |
| ---           | Transcribed locus                                              | BG143461  |              | 1436570_at   | 58.100   | 49.100  | 273.000  | 473.400  | 410.500  |
| Osbpl8        | oxysterol binding protein-like 8                               | BG969333  | 10 D1        | 1437069_at   | 126.800  | 80.500  | 442.200  | 225.100  | 176.800  |
| Tes           | testis derived transcript                                      | BC010465  | 6 A2         | 1460378_a_at | 107.100  | 57.200  | 312.500  | 374.000  | 604.200  |
| Ctsc          | cathepsin C                                                    | NM_009982 | 7 D3-E1.1    | 1416382_at   | 217.800  | 193.000 | 1043.400 | 899.800  | 1579.700 |
| Gsn           | gelsolin                                                       | AV224521  | 2 B          | 1456312_x_at | 202.400  | 110.000 | 590.900  | 128.300  | 320.000  |
| Fut8          | fucosyltransferase 8                                           | NM_016893 | 12 C3        | 1460319_at   | 453.900  | 266.900 | 1432.100 | 821.200  | 1852.700 |
| B3gnt2        | UDP-GlcNAc:betaGal beta-1,3-N-Tnf receptor-associated factor 3 | AV306734  | 11 A3.2      | 1450026_a_at | 125.200  | 120.000 | 640.500  | 402.600  | 255.200  |
| Traf3         | Tnf receptor-associated factor 3                               | U21050    | 12 F         | 1418587_at   | 70.800   | 45.300  | 241.100  | 345.500  | 395.100  |
| Itga4         | integrin alpha 4                                               | BB205589  | 2 C3         | 1436037_at   | 80.000   | 98.800  | 525.600  | 431.200  | 245.100  |
| Nfkbia        | nuclear factor of kappa light chain gene enhancer in B-cells   | AI462015  |              | 1420088_at   | 1100.500 | 521.400 | 2713.800 | 6326.200 | 2784.800 |
| Lyn           | Yamaguchi sarcoma viral (v-ves-1) oncogene homolog             | M57697    | 4 A1         | 1451318_a_at | 136.600  | 89.700  | 459.700  | 495.300  | 309.700  |

|      |                      |           |         |              |         |         |          |          |          |
|------|----------------------|-----------|---------|--------------|---------|---------|----------|----------|----------|
| Gusb | glucuronidase, beta  | NM_010368 | 5 G1.3  | 1448124_at   | 138.500 | 175.200 | 892.300  | 272.600  | 1145.100 |
| B2m  | beta-2 microglobulin | BF715219  | 2 F1-F3 | 1449289_a_at | 610.500 | 571.100 | 2860.500 | 5307.900 | 4332.300 |

---

After ESCs differentiated into EB6 cells without HOXB4 expression, c-Kit+CD41+ cells were isolated (EB6). These cells were co-cultured with OP9 cells for 4 days, with or without HOXB4 expression, followed by recovery of c-Kit+CD41+ cells from the co-cultures (HOXB4-off and HOXB4-on). CD34-KSL cells were isolated from adult bone marrow cells. Since most freshly isolated CD34-KSL cells are in hibernation (hibernating HSCs), to obtain cycling HSCs, CD34-KSL cells were cultivated in the presence of stem cell factor and TPO for 24 hours (cycling HSCs). RNAs extracted from these samples were used for microarray analysis. To increase the reliability of data, probes with gene chip scores > 200 in HOXB4-off or HOXB4-on data were used for comparison. The HOXB4-on : HOXB4-off ratio of >5.0 was used for selection of up-regulated genes. To see if up-regulated genes include genes expressed in adult HSCs, probes with gene chip scores >200 were extracted from data for hibernating and cycling HSCs and used for comparison.
