# Supplementary material for: Stepwise Development of Hematopoietic Stem Cells from Embryonic Stem Cells
Source: PubMed Central journal article supplement (PMC2653650; doi:10.1371/journal.pone.0004820), 2009-03-16
Supplement: pone.0004820.s004.pdf [file pone.0004820.s004.pdf]

Table S4 Adult HSC-unrelated genes down-regulated by HOXB4

| Gene          | Gene Title                                                      | Genbank   | Map                  | MOE430v2     | EB6                 | HOXB4-off    | HOXB4-on  | Hibernating HSC | Cycling HSCs |        |        |
|---------------|-----------------------------------------------------------------|-----------|----------------------|--------------|---------------------|--------------|-----------|-----------------|--------------|--------|--------|
| Slc32a1       | solute carrier family 32 (GABA vesicular transporter), member 1 | NM_009508 | chr2 H1-3            | 1422756_at   | 214.200             | 260.600      | 1.200     | 1.100           | 1.000        |        |        |
|               |                                                                 |           |                      | 1419592_at   | 178.500             | 210.200      | 1.200     | 3.300           | 3.800        |        |        |
| Hba-x         | hemoglobin X, alpha-like embryonic chain in Hba complex         | M26898    | chr11 A4 11 16.0 cM  | 1448716_at   | 6059.601            | 6028.199     | 41.100    | 3.500           | 0.800        |        |        |
| Lin28         | lin-28 homolog (C. elegans)                                     | BB706377  | chr4 D3              | 1437752_at   | 363.800             | 357.600      | 5.400     | 0.400           | 3.100        |        |        |
| Alas2         | aminolevulinic acid synthase 2, erythroid                       | M63244    | chrX F3 X 63.0 cM    | 1451675_a_at | 451.500             | 537.200      | 10.600    | 0.500           | 0.400        |        |        |
|               |                                                                 |           |                      | NM_008007    | chr7 F5 7 72.4 cM   | 1422923_at   | 147.800   | 246.800         | 1.200        | 4.200  | 8.700  |
|               |                                                                 |           |                      | AV302620     | ---                 | 1441350_at   | 265.400   | 503.500         | 6.700        | 7.000  | 1.400  |
| Fgf3          | fibroblast growth factor 3                                      | BB391920  | chr7 F5 7 72.4 cM    | 1441914_x_at | 139.500             | 201.600      | 4.100     | 1.900           | 2.300        |        |        |
| Trim10        | tripartite motif protein 10                                     | NM_011280 | chr17 B1             | 1419311_at   | 243.600             | 303.700      | 9.800     | 7.900           | 2.900        |        |        |
| Hand2         | ---                                                             | BB029192  | ---                  | 1436041_at   | 337.000             | 315.000      | 12.000    | 3.900           | 0.200        |        |        |
|               |                                                                 |           |                      | BB036951     | chr13 C3            | 1438020_at   | 357.200   | 279.900         | 9.400        | 0.700  | 0.500  |
| Hapln1        | hyaluronan and proteoglycan link protein 1                      | AF098460  | chr13 C3             | 1426294_at   | 246.200             | 211.500      | 9.300     | 0.200           | 2.400        |        |        |
| Epb4.2        | erythrocyte protein band 4.2                                    | U03487    | chr2 E5 2 67.5 cM    | 1417337_at   | 137.800             | 224.500      | 9.900     | 14.000          | 2.400        |        |        |
| D130058I21Rik | RIKEN cDNA D130058I21 gene                                      | BB458758  | chr11 B4             | 1455794_at   | 478.400             | 530.600      | 24.500    | 13.800          | 5.800        |        |        |
|               |                                                                 |           |                      | AV147727     | chr7 E3 7 49.96 cM  | 1437990_x_at | 11821.904 | 10749.297       | 308.000      | 0.500  | 0.400  |
|               |                                                                 |           |                      | AV311770     | chr7 E3 7 49.96 cM  | 1437810_a_at | 10115.196 | 9833.396        | 302.300      | 7.700  | 12.900 |
| Hbb-bh1       | hemoglobin Z, beta-like embryonic chain                         | NM_008219 | chr7 E3 7 49.96 cM   | 1450736_a_at | 9369.304            | 8375.498     | 411.000   | 1.100           | 0.400        |        |        |
|               |                                                                 |           |                      | NM_008221    | chr7 E3 7 49.95 cM  | 1450621_a_at | 1637.000  | 1144.200        | 35.800       | 0.400  | 0.800  |
|               |                                                                 |           |                      | AV148191     | chr7 E3 7 49.95 cM  | 1436823_x_at | 4416.398  | 3291.301        | 162.400      | 3.100  | 49.200 |
| Hbb-y         | hemoglobin Y, beta-like embryonic chain                         | AV156860  | chr7 E3 7 49.95 cM   | 1436717_x_at | 4365.399            | 3295.899     | 163.200   | 3.200           | 46.800       |        |        |
| Rragd         | Ras-related GTP binding D                                       | BF462770  | chr4 A5 4 11.4 cM    | 1434909_at   | 339.700             | 302.300      | 15.500    | 18.000          | 3.000        |        |        |
| Slc30a10      | solute carrier family 30, member 10                             | BB540543  | chr1 H5              | 1439934_at   | 215.000             | 246.200      | 13.300    | 8.000           | 3.000        |        |        |
| Slc39a8       | solute carrier family 39 (metal ion transporter), member 8      | NM_026228 | chr3 G3 3 66.0 cM    | 1448482_at   | 650.100             | 638.800      | 35.200    | 3.900           | 6.400        |        |        |
|               |                                                                 |           |                      | M26385       | chr8 C2 8 36.0 cM   | 1425643_at   | 602.400   | 840.900         | 42.200       | 1.200  | 1.000  |
| Gypa          | glycophorin A                                                   | NM_010369 | chr8 C2 8 36.0 cM    | 1423016_a_at | 703.200             | 971.800      | 55.500    | 0.200           | 0.500        |        |        |
| Reln          | reelin                                                          | NM_011261 | chr5 A3-B1 5 8.0 cM  | 1449465_at   | 1978.700            | 2389.501     | 141.700   | 7.600           | 4.700        |        |        |
| Unc5c         | unc-5 homolog C (C. elegans)                                    | NM_009472 | chr3 H1 3 68.5 cM    | 1449522_at   | 280.900             | 301.800      | 18.200    | 17.500          | 11.300       |        |        |
| Capn6         | calpain 6                                                       | AI747133  | chrX F2              | 1450429_at   | 335.300             | 206.800      | 13.300    | 1.100           | 3.700        |        |        |
| Rspo3         | R-spondin 3 homolog (Xenopus laevis)                            | BG072958  | chr10 A4             | 1455607_at   | 376.000             | 477.200      | 34.000    | 3.200           | 4.000        |        |        |
| Sox11         | SRY-box containing gene 11                                      | BG072739  | chr12 A3             | 1436790_a_at | 237.600             | 215.700      | 16.100    | 0.200           | 7.500        |        |        |
| Dp111         | receptor accessory protein 6                                    | AK002562  | chr10 C1             | 1430128_a_at | 264.500             | 325.000      | 25.700    | 22.900          | 32.000       |        |        |
| Mdk           | midkine                                                         | M34328    | chr2 E1 2 53.0 cM    | 1416006_at   | 3244.600            | 3309.301     | 265.000   | 46.300          | 13.800       |        |        |
| Tspan12       | tetraspanin 12                                                  | BB072896  | chr6 A3.1            | 1454604_s_at | 188.500             | 321.900      | 26.800    | 6.400           | 1.200        |        |        |
| Igfbp5        | insulin-like growth factor binding protein 5                    | BF225802  | chr1 C3 1 36.1 cM    | 1452114_s_at | 413.800             | 334.000      | 27.900    | 0.900           | 0.500        |        |        |
| Nasp          | nuclear autoantigenic sperm protein (histone-binding)           | BB493242  | chr4 56.5 cM         | 1416043_at   | 409.500             | 444.800      | 37.900    | 1.000           | 2.400        |        |        |
| Fn1           | fibronectin 1                                                   | BM234360  | chr1 C1-C5 1 36.1 cM | 1437218_at   | 339.000             | 363.400      | 34.600    | 1.400           | 6.100        |        |        |
|               |                                                                 |           |                      | BE283964     | chr3 H3             | 1429298_at   | 628.400   | 799.200         | 25.000       | 3.400  | 8.300  |
|               |                                                                 |           |                      | BB770857     | chr3 H3             | 1455400_at   | 180.700   | 241.600         | 9.000        | 1.000  | 6.300  |
| Ddah1         | dimethylarginine dimethylaminohydrolase 1                       | AW556888  | chr3 H3              | 1454995_at   | 282.200             | 296.600      | 32.200    | 15.500          | 14.800       |        |        |
|               |                                                                 |           |                      | NM_008218    | chr11 A4 11 16.0 cM | 1417714_x_at | 776.600   | 841.900         | 43.600       | 0.500  | 0.500  |
|               |                                                                 |           |                      | AK011116     | chr11 A4 11 16.0 cM | 1452757_s_at | 7352.003  | 6973.301        | 763.300      | 10.000 | 9.800  |
| Hba-a1        | hemoglobin alpha, adult chain 1                                 | AK011116  | chr11 A4 11 16.0 cM  | 1428361_x_at | 7497.502            | 7305.399     | 832.900   | 12.500          | 1.700        |        |        |
| Sall4         | sal-like 4 (Drosophila)                                         | BG064756  | chr2 H3 2 99.0 cM    | 1424152_at   | 363.800             | 299.500      | 37.000    | 7.300           | 0.500        |        |        |
| Enpp1         | ectonucleotide pyrophosphatase/phosphodiester                   | AF339910  | chr10 A4 10 19.0 cM  | 1419276_at   | 268.000             | 303.400      | 38.100    | 23.300          | 12.700       |        |        |
| B230112C05Rik | RIKEN cDNA B230112C05 gene                                      | BB476773  | chr13 D1             | 1435783_at   | 211.900             | 250.800      | 31.500    | 12.400          | 6.500        |        |        |
|               |                                                                 |           |                      | NM_009221    | chr6 B3 6 29.0 cM   | 1418493_a_at | 282.700   | 403.700         | 44.700       | 12.000 | 9.300  |
| Snca          | synuclein, alpha                                                | AI324124  | chr6 B3 6 29.0 cM    | 1436853_a_at | 674.200             | 894.800      | 127.800   | 15.000          | 17.400       |        |        |
| Agtr1         | angiotensin receptor-like 1                                     | BB483357  | chr2 E1              | 1438651_a_at | 1695.800            | 1213.100     | 175.400   | 2.500           | 2.200        |        |        |

|               |                                                  |           |                     |              |         |         |        |        |        |
|---------------|--------------------------------------------------|-----------|---------------------|--------------|---------|---------|--------|--------|--------|
| Slc38a5       | solute carrier family 38, member 5               | BG066984  | chrX A1.1           | 1454622_at   | 244.000 | 294.900 | 44.000 | 8.100  | 0.700  |
| Eraf          | erythroid associated factor                      | NM_133245 | ---                 | 1449077_at   | 285.800 | 331.600 | 51.000 | 40.200 | 3.600  |
| Podxl         | podocalyxin-like                                 | AF290209  | chr6 A3.3 6 10.0 cM | 1417396_at   | 256.700 | 233.900 | 36.000 | 1.800  | 12.400 |
| Cth           | cystathionase (cystathionine gamma-lyase)        | BC019483  | chr3 H4             | 1426243_at   | 252.700 | 390.200 | 62.300 | 11.800 | 13.600 |
| 2010011120Rik | RIKEN cDNA 2010011120 gene                       | AK008190  | chr2 H3             | 1424695_at   | 196.800 | 245.200 | 39.300 | 11.400 | 26.700 |
| Igsf4a        | immunoglobulin superfamily, member 4A            | NM_018770 | chr9 B-C            | 1417378_at   | 189.800 | 209.800 | 36.600 | 32.600 | 16.200 |
|               |                                                  | BB130087  | chr9 D              | 1456329_at   | 532.500 | 550.100 | 86.100 | 4.400  | 0.800  |
| A230098A12Rik | protogenin homolog (Gallus gallus)               | BB295128  | chr9 D              | 1438410_at   | 275.300 | 341.400 | 60.200 | 3.200  | 9.600  |
| Gldc          | glycine decarboxylase                            | NM_138595 | chr19 C 19 25.0 cM  | 1416049_at   | 269.400 | 326.600 | 58.000 | 2.100  | 7.200  |
| Abtb2         | ankyrin repeat and BTB (POZ) domain containing 2 | BB621938  | chr2 E2             | 1433453_a_at | 170.300 | 217.500 | 40.800 | 47.800 | 22.900 |

After ESCs differentiated into EB6 cells without HOXB4 expression, c-Kit+CD41+ cells were isolated (EB6). These cells were co-cultured with OP9 cells for 4 days, with or without HOXB4 expression, followed by recovery of c-Kit+CD41+ cells from the co-cultures (HOXB4-off and HOXB4-on). CD34-KSL cells were isolated from adult bone marrow cells. Since most freshly isolated CD34-KSL cells are in hibernation (hibernating HSCs), to obtain cycling HSCs, CD34-KSL cells were cultivated in the presence of stem cell factor and TPO for 24 hours (cycling HSCs). RNAs extracted from these samples were used for microarray analysis. To increase the reliability of data, probes with gene chip scores > 200 in HOXB4-off or HOXB4-on data were used for comparison. The HOXB4-on : HOXB4-off ratio of <0.2 was used for down-regulated genes. To see if down-regulated genes include genes not expressed in adult HSCs, probes with gene chip scores <50 were extracted from data for hibernating and cycling HSCs and used for comparison.
