# Supplementary material for: Stepwise Development of Hematopoietic Stem Cells from Embryonic Stem Cells
Source: PubMed Central journal article supplement (PMC2653650; doi:10.1371/journal.pone.0004820), 2009-03-16
Supplement: pone.0004820.s005.pdf [file pone.0004820.s005.pdf]

**Table S5 PCR primers**

| Genes            | Forward                      | Reverse                     |
|------------------|------------------------------|-----------------------------|
| <i>mHoxB4</i>    | 5'-TGGATGCGCAAAGTTCACGTG-3'  | 5'-ATCTTGGTGTGGGCAACTTG-3'  |
| <i>hHOXB4</i>    | 5'-AGAACCCCCTGCACCCCA-3'     | 5'-AGAACCCCCTGCACCCCA-3'    |
| <i>Runx1</i>     | 5'-TCCTATGACCAGTCCTACCAG-3'  | 5'-CCGTAGTATAGATGGTAGGAG-3' |
| <i>Gata1</i>     | 5'-AAAGATGGAATCCAGACGAGG-3'  | 5'-GTCAAGGCTATTCTGTGTACC-3' |
| <i>Gata2</i>     | 5'-AGTGCATGCAAGAGAAGTCAC-3'  | 5'-ATGGCAGTCACCATGCTGGAC-3' |
| <i>Hbb-bh1</i>   | 5'-AGTCCCCATGGAGTCAAAGA-3    | 5'-CTCAAGGAGACCTTTGCTCA-3'  |
| <i>Hbb-b1</i>    | 5'-CTGACAGATGCTCTCTTGGG-3'   | 5'-CACAACCCAGAAACAGACA-3'   |
| <i>Scl</i>       | 5'-TGAAGATGGCACGGTCTTCTC-3'  | 5'-ATGGGAGAAAGGCAAGGCAG-3'  |
| <i>Brachyury</i> | 5'-TGCAGTCCATGATAACTGG-3'    | 5'-TACTGGCTGTCAGAAATGTC-3'  |
| <i>Flkl</i>      | 5'-ATCTCCAGAACAGTAAGCGAAA-3' | 5'-TCCCTGAGTCAGCGTGAA-3'    |
| <i>Gapdh</i>     | 5'-CTTACCACCATGGAGAAGGC-3'   | 5'-GGCATGGACTGTGGTCAT-3'    |

PCR primers used in this study are listed.
